# Supplementary material
Source: PubMed Central journal article supplement (PMC3811789)
Supplement: IAI.00778-13_zii999090346so1.pdf [file IAI.00778-13_zii999090346so1.pdf]

## 1 **METHODS**

### 2 **RNA extraction**

3       The D39 WT and the  $\Delta arcD$  mutant were grown in 10 ml THY broth to an OD<sub>620</sub> of  
4 0.6. Bacteria were harvested by centrifugation, resuspended into 500  $\mu$ l RLT buffer from  
5 the RNeasy Mini kit (Qiagen), and milled with 0.1 mm zirconia beads (Biospec Products)  
6 using a mini bead beater (Biospec Products) twice of 100 sec, with 5 min interval of  
7 incubation on ice. The lysate was centrifuged, and the supernatant was used to isolate  
8 RNA following the instructions of the kit. RNA samples were treated twice with an  
9 RNase-free DNase set (Qiagen) as per the manufacturer's instruction. Removal of  
10 genomic DNA was verified by PCR using 0.1  $\mu$ g RNA as template.

### 11 **cDNA synthesis and reverse transcriptase PCR (RT-PCR)**

12       For each reaction of cDNA synthesis, one microgram of RNA was used as the  
13 template for reverse transcription with iScript cDNA Synthesis Kit (Bio-Rad).  
14 Subsequently, cDNA was amplified by quantitative PCR with specific primers (Table S1)  
15 using iQ SYBR Green Supermix and iQ Single Color Real Time PCR Detection System  
16 (Bio-Rad) according to the manufacturer's instruction. Assays were conducted in  
17 triplicates of 25  $\mu$ l reaction volume using 96-well plates as previously described (1).  
18 Relative gene expression was analyzed using PFAFFL method (2) and fold changes were  
19 normalized to *gyrA*. A two-fold or greater change in mRNA levels of the mutant relative  
20 to the D39 WT was considered significant.

### 21 **References**

- 22 1. **Thornton J, McDaniel LS.** 2005. THP-1 monocytes up-regulate intercellular  
 23 adhesion molecule 1 in response to pneumolysin from *Streptococcus pneumoniae*.  
 24 Infect Immun **73**:6493-8.
- 25 2. **Pfaffl MW, Horgan GW, Dempfle L.** 2002. Relative expression software tool  
 26 (REST) for group-wise comparison and statistical analysis of relative expression  
 27 results in real-time PCR. Nucleic Acids Res **30**:e36.
- 28 3. **Krogh A, Larsson B, von Heijne G, Sonnhammer EL.** 2001. Predicting  
 29 transmembrane protein topology with a hidden Markov model: application to  
 30 complete genomes. J Mol Biol **305**:567-80.

31  
 32 **Table S1.** Primers used in this study

| Purpose              | Primer | Sequence (5' to 3')                          |
|----------------------|--------|----------------------------------------------|
| <b>Mutagenesis</b>   |        |                                              |
| <i>arcD</i>          | Pr1615 | AAGGTAGCATCGGTTTCTGGTTG                      |
|                      | Pr1616 | ACACTCTAGATTTGTTTTTCCTCCTGATGTCTAA           |
|                      | Pr1668 | ATCGCTCGAGTATTGTAGTGACCATCGCCCTTCT           |
|                      | Pr1669 | TGGAGAGGAGCAAGAATGGTAGC                      |
| <i>arcT</i>          | Pr1670 | TGAATCCATTTGCGACAGG                          |
|                      | Pr1671 | ACACTCTAGATCATGGAATCACCTCACTCACTA            |
|                      | Pr1617 | ATCGCTCGAGGCTAGTCAAGGTATCAATGCTGTC           |
|                      | Pr1618 | GATAGACGGCTTCGGCATAA                         |
| Janus cassette       | Pr1097 | GAGATCTAGAACCGTTTGATTTTAAATGGATAATG          |
|                      | Pr1098 | GAGACTCGAGCCTTTCCTTATGCTTTTGGAC              |
| <b>RT-PCR</b>        |        |                                              |
| <i>cps2A</i>         | Pr2809 | ATCACGTTACAGAAAGTGAAGC                       |
|                      | Pr2810 | CTAGTAGGACTAACGCAGTTACC                      |
| <i>cps2B</i>         | Pr2811 | TGATGTAGATGACGGTCCCAAGT                      |
|                      | Pr2812 | TTCTGCTATCTTCTCTTCCGGAG                      |
| <i>gyrA</i>          | Pr2783 | CGTTACATGCTTGTAGATGG                         |
|                      | Pr2784 | TGGCATCATAGTTATCAACG                         |
| <b>Other primers</b> |        |                                              |
| <i>gyrA</i> promoter | Pr2774 | TTTTGTGACCCAAGCTCTTGTGCAATTCC                |
|                      | Pr2775 | TTTTGGATCCGCATGCGGTACCCATTAATAAATGCCTCATTTTC |
| <i>arcD</i> ORF      | Pr2704 | ACACGGATCCAGTGAAAAAGCTAAAAAAGGG              |
|                      | Pr1673 | CGGGATCCTCATGGAATCACCTCACTCACTA              |

33 **Legends of supplemental figures**

34 **Fig. S1.** Genetic organization and predicted functions of *S. pneumoniae arc* locus. (A)  
35 Schematic representation of *arc* locus in *S. pneumoniae*. The putative function of each  
36 gene is indicated. The size of each protein (in amino acids) is shown above, and the space  
37 of each intergenic region (in base pairs) is also marked between the adjacent genes. (B)  
38 Predicted functions of *arcABCD* genes in *S. pneumoniae* based on published homologs.  
39 Purple, gray, and yellow colors denote Gram-positive *S. pneumoniae*, capsule, and  
40 proteins, respectively. Arg, Cit, and Orn denote arginine, citrulline, and ornithine,  
41 respectively.

42 **Fig. S2.** Infection of A549 cells with the D39 WT and its  $\Delta arcD$  mutant. Gram stain  
43 showing bacterial association with A549 cells that were seeded on coverslips and  
44 observed under microscope (1000  $\times$ ).

45 **Fig. S3.** qRT-PCR analysis of *cps2A* and *cps2B* genes compared between the D39 WT  
46 and its  $\Delta arcD$  mutant. Data shown are the means of two independent experiments. Error  
47 bars denote the SEM.

48 **Fig. S4.** Topological model showing the predicted structure of ArcD protein in the  
49 cytoplasmic membrane. This model was generated using TMHMM program  
50 (<http://www.cbs.dtu.dk/services/TMHMM>) based on a hidden Markov model (3).

51 **Fig. S5.** Growth of pneumococci in complete CDM (JRH Bioscience). The D39 WT and  
52 its  $\Delta arcD$ ,  $\Delta arcT$ , and  $\Delta arcDT$  mutants were inoculated in 10 ml of CDM broth and were  
53 monitored hourly at OD<sub>620</sub> for 15 h. Data shown are the means of three repeat  
54 experiments. Error bars denote the SEM.

55

**A**

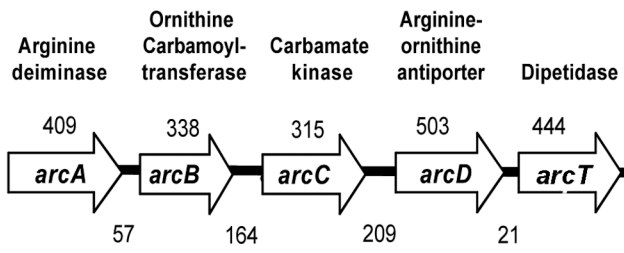

**B**

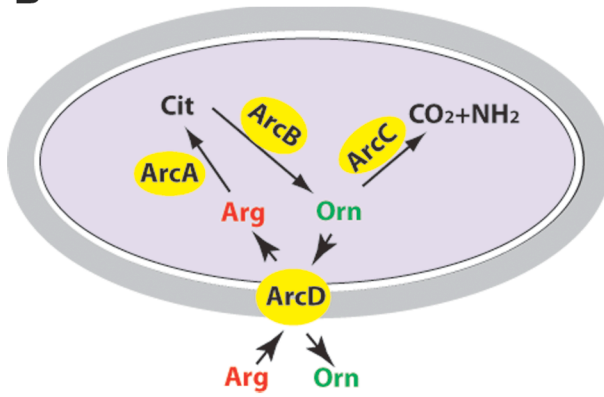

57 Fig. S2

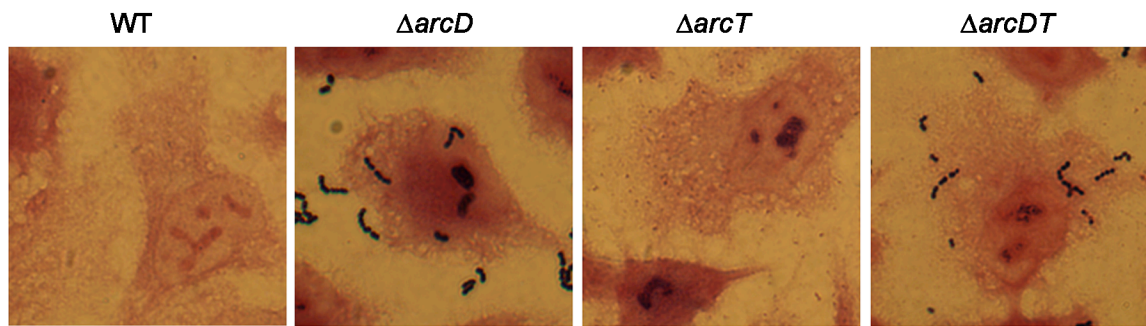

59 Fig. S3

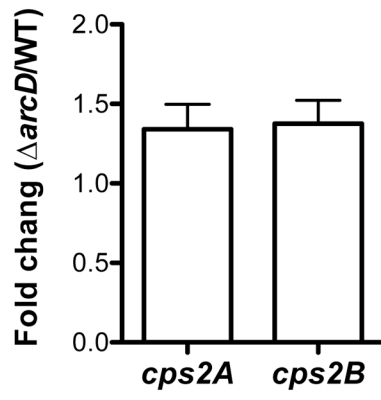

60



63 Fig. S5

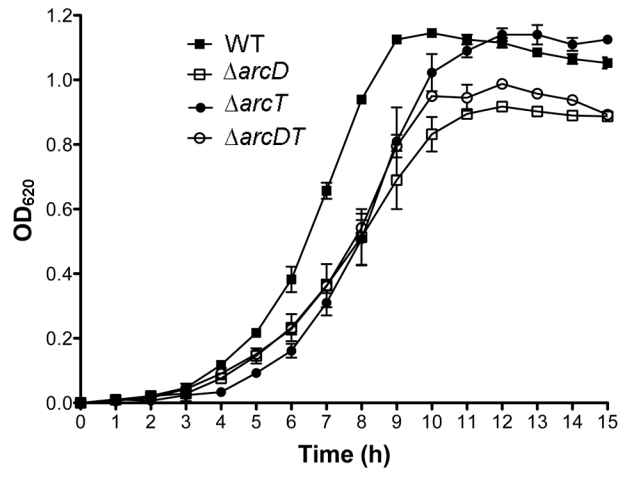

64
